# Supplementary material for: Genomic landscape of human diversity across Madagascar
Source: HighWire-hosted journal article supplement (doi:10.1073/pnas.1704906114), 2017-07-17

## Figure S2: Admixture Analysis

**S2.A)** ADMIXTURE plots for  $K=3$ , 9, and 23 of the low SNP density dataset, followed by the plot of cross-validation values.

**K=3**

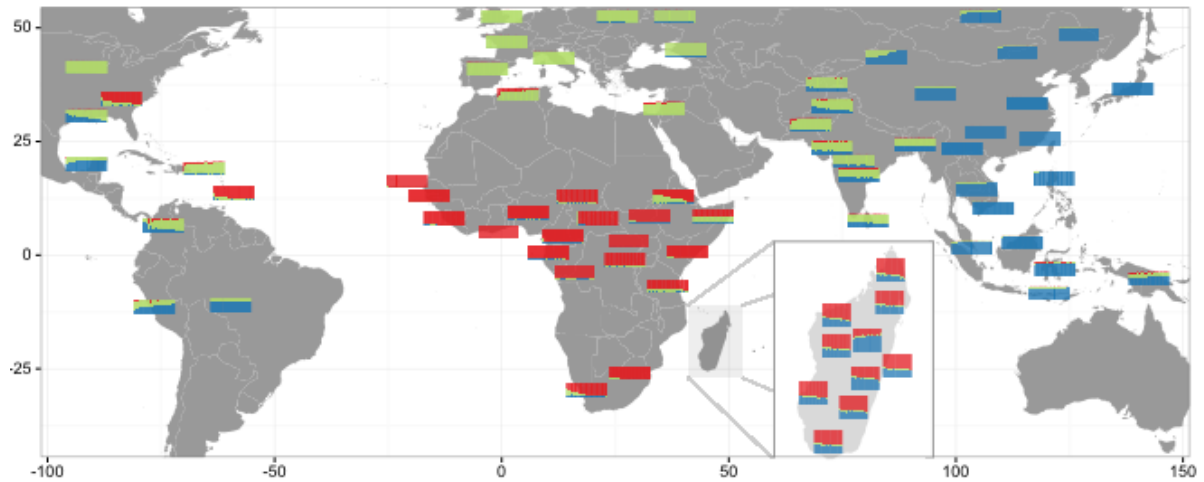

**K=9**

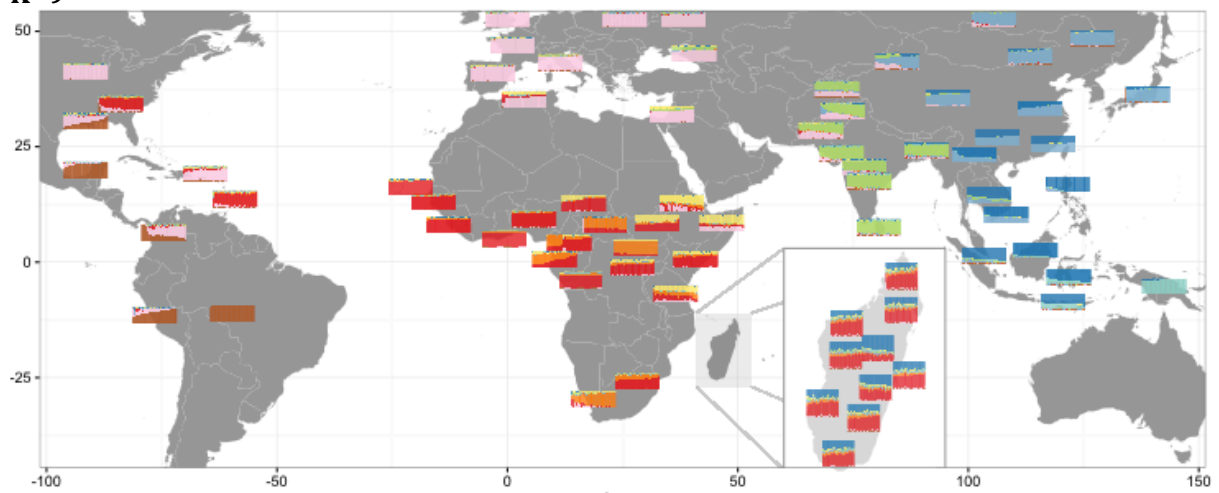

**K=23**

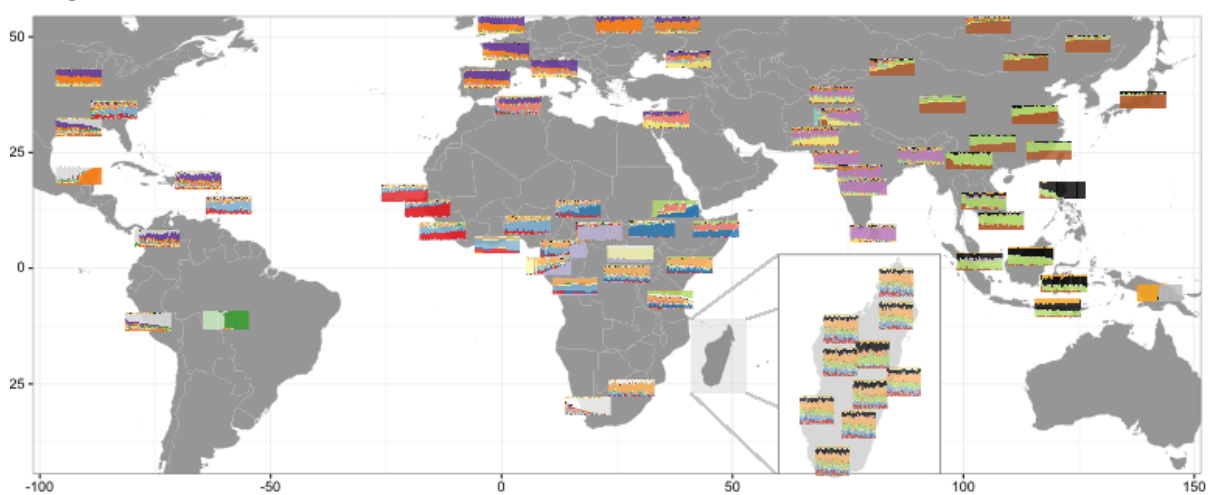

### Cross validation values

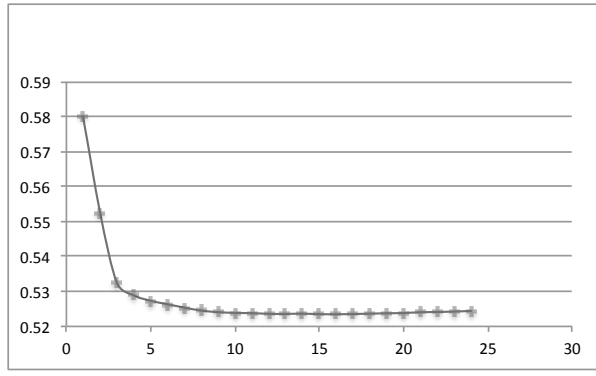

**S2.B)** ADMIXTURE plots for K=8 and K=13 with the PANASIAN dataset, followed by the plot of cross-validation values.

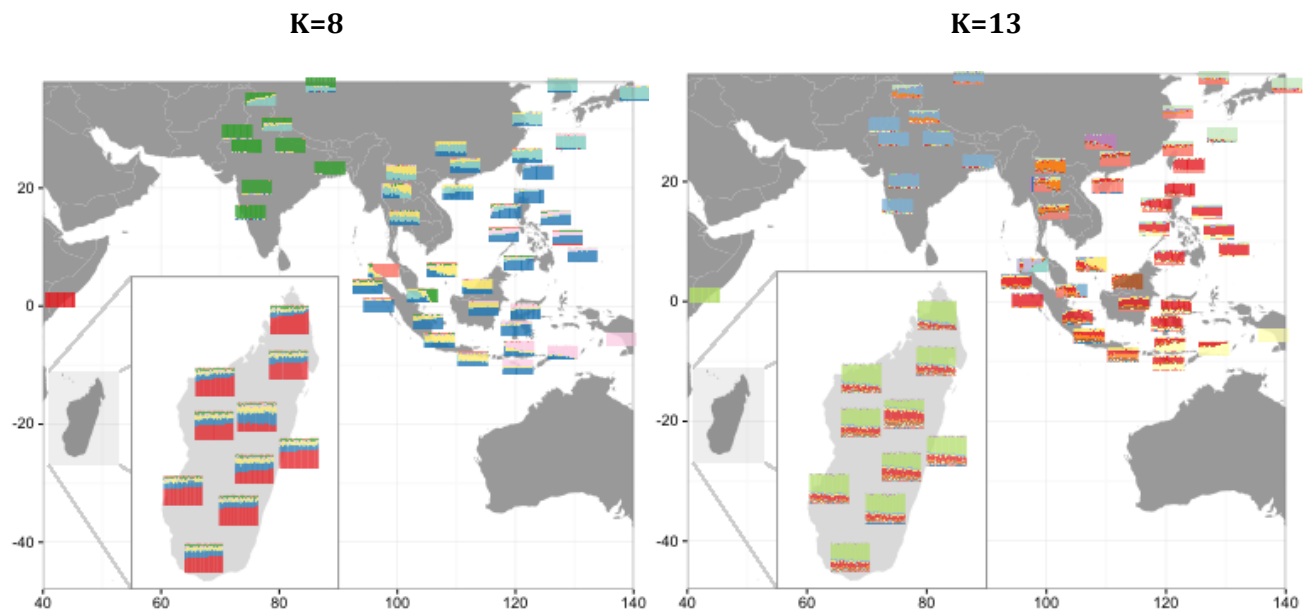

### Cross validation values

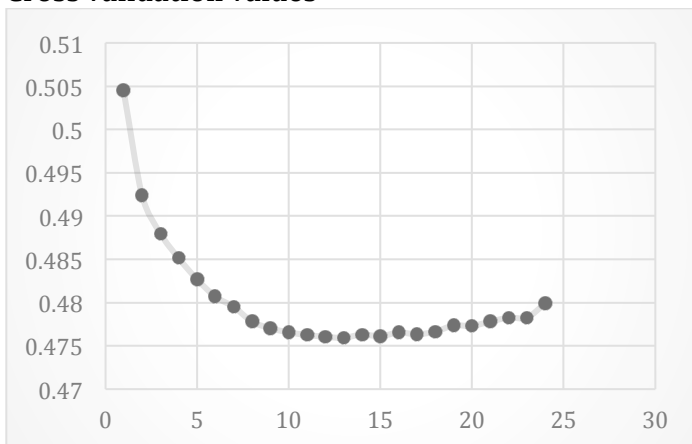

**S2.C)** ADMIXTURE plots for K=3 and K=9 of the high density dataset 1, followed by the plot of cross-validation values. Below each plot is the average fraction of each ancestry component in each Malagasy genetic group; ancestry components are colored according to the map and named according to the population/region that exhibits the highest frequency of that component

**K=3**

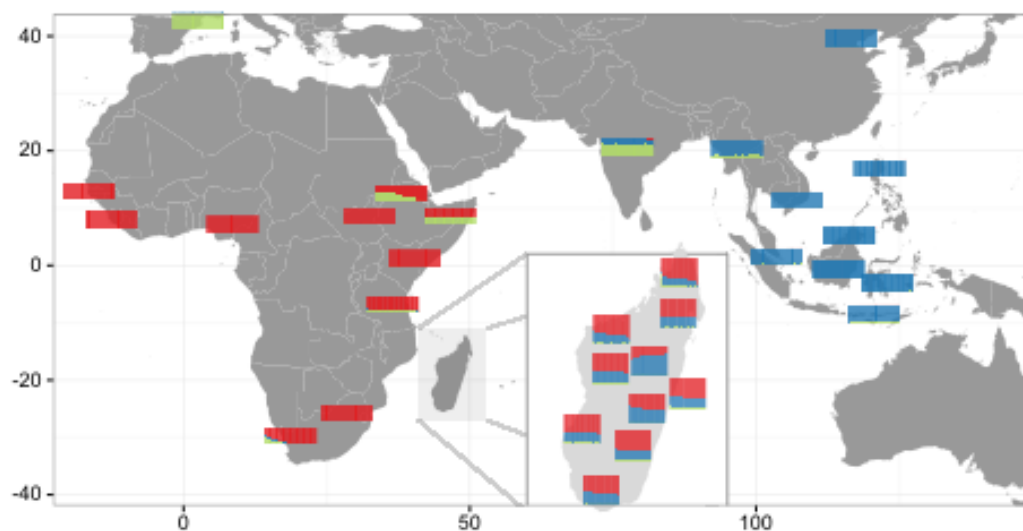

|            | Africa          | East Asia       | West Eurasia   |
|------------|-----------------|-----------------|----------------|
| <b>g01</b> | 32.1% $\pm$ 0.5 | 65.3% $\pm$ 0.5 | 2.6% $\pm$ 0.1 |
| <b>g02</b> | 50.1% $\pm$ 0.5 | 46.8% $\pm$ 0.5 | 3.2% $\pm$ 0.1 |
| <b>g03</b> | 70.9% $\pm$ 0.7 | 22.6% $\pm$ 0.5 | 6.5% $\pm$ 0.5 |
| <b>g04</b> | 61.7% $\pm$ 0.3 | 34.2% $\pm$ 0.4 | 4.1% $\pm$ 0.1 |
| <b>g05</b> | 59.3% $\pm$ 0.3 | 37.1% $\pm$ 0.3 | 3.6% $\pm$ 0.1 |
| <b>g06</b> | 66.9% $\pm$ 0.5 | 29% $\pm$ 0.5   | 4.1% $\pm$ 0.1 |
| <b>g07</b> | 64.5% $\pm$ 0.3 | 32% $\pm$ 0.3   | 3.6% $\pm$ 0.1 |
| <b>g08</b> | 64.2% $\pm$ 0.2 | 32.2% $\pm$ 0.2 | 3.6% $\pm$ 0.1 |
| <b>g09</b> | 59% $\pm$ 0.3   | 37.4% $\pm$ 0.3 | 3.5% $\pm$ 0.1 |
| <b>g10</b> | 61.9% $\pm$ 0.3 | 34.3% $\pm$ 0.3 | 3.7% $\pm$ 0.2 |

K=9

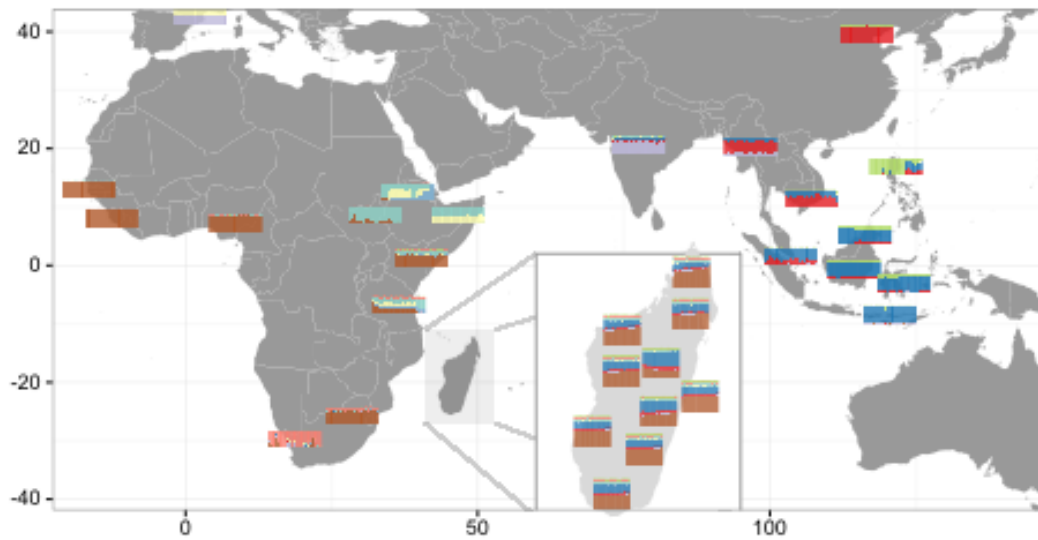

|     | EAST ASIA   |             |             | INDIA      | AFRICA      |            |            |            |            |
|-----|-------------|-------------|-------------|------------|-------------|------------|------------|------------|------------|
|     | Indonesia   | Cont. Asia  | Phillipines | India      | Bantu       | Hunter G.  | A. Horn 1  | A. Horn 2  | East Af.   |
| g01 | 46.9% ± 0.4 | 11.2% ± 0.2 | 7.2% ± 0.1  | 1.9% ± 0.1 | 25.7% ± 0.4 | 2% ± 0.1   | 0.5% ± 0.1 | 0.9% ± 0.1 | 3.6% ± 0.1 |
| g02 | 32.7% ± 0.4 | 8.9% ± 0.4  | 5.1% ± 0.1  | 2% ± 0.1   | 39.9% ± 0.4 | 3.7% ± 0.1 | 0.8% ± 0.1 | 1.3% ± 0.1 | 5.7% ± 0.1 |
| g03 | 15.4% ± 0.4 | 4% ± 0.2    | 2.5% ± 0.1  | 3.6% ± 0.3 | 55.9% ± 0.6 | 5.7% ± 0.1 | 1.4% ± 0.1 | 3.3% ± 0.3 | 8.1% ± 0.1 |
| g04 | 24.2% ± 0.3 | 6% ± 0.2    | 3.8% ± 0.1  | 2.2% ± 0.1 | 48.9% ± 0.3 | 5% ± 0.1   | 1.1% ± 0.1 | 2% ± 0.1   | 6.7% ± 0.2 |
| g05 | 25.9% ± 0.2 | 6.7% ± 0.2  | 4.3% ± 0.1  | 2% ± 0.1   | 46.9% ± 0.2 | 4.6% ± 0.1 | 1.2% ± 0.1 | 1.7% ± 0.1 | 6.7% ± 0.1 |
| g06 | 20.2% ± 0.4 | 5.3% ± 0.2  | 3.1% ± 0.1  | 2.3% ± 0.1 | 53% ± 0.5   | 5.2% ± 0.1 | 1.3% ± 0.1 | 2% ± 0.1   | 7.5% ± 0.1 |
| g07 | 22.4% ± 0.3 | 5.8% ± 0.2  | 3.5% ± 0.1  | 2.1% ± 0.1 | 51.2% ± 0.2 | 5.1% ± 0.1 | 1.1% ± 0.1 | 1.6% ± 0.1 | 7.3% ± 0.1 |
| g08 | 22.8% ± 0.2 | 5.6% ± 0.1  | 3.5% ± 0.1  | 2% ± 0.1   | 50.7% ± 0.2 | 5.2% ± 0.1 | 1% ± 0.1   | 1.8% ± 0.1 | 7.5% ± 0.1 |
| g09 | 26.6% ± 0.3 | 6.5% ± 0.2  | 4.1% ± 0.1  | 2% ± 0.1   | 46.8% ± 0.3 | 4.6% ± 0.1 | 1.1% ± 0.1 | 1.7% ± 0.1 | 6.7% ± 0.1 |
| g10 | 24.3% ± 0.3 | 6.1% ± 0.2  | 3.6% ± 0.1  | 2% ± 0.1   | 49.2% ± 0.3 | 4.8% ± 0.1 | 1.2% ± 0.1 | 1.8% ± 0.1 | 6.9% ± 0.1 |

### Cross validation values

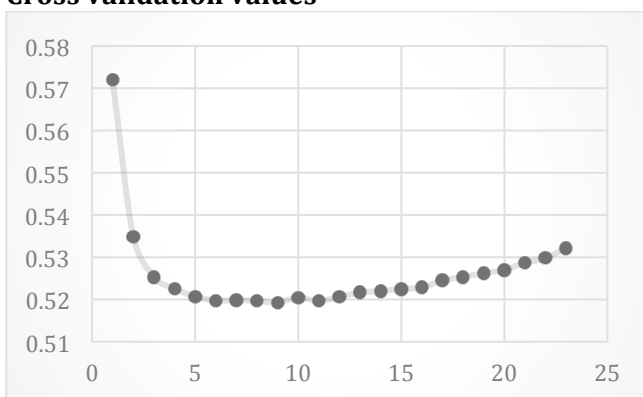

Supplement: pnas.1704906114.sfig02.pdf [file pnas.1704906114.sfig02.pdf]
